# Supplementary material for: Adenoma-Derived Organoids for Precision Therapy
Source: MDPI journal article supplement (doi:10.3390/organoids1010006), 2022-05-23
Supplement: s1 [file s1]

Archive with 1 entries (1 files):
- organoids-1718858-supplementary.pdf
